# Supplementary material for: Formation of a tris-capsule and a tris-carceplex from a cyclic six-bowl assembly
Source: Royal Society of Chemistry journal article supplement (doi:10.1039/b204089a), 2002-01-01
Supplement: b204089a.doc [file b204089a.doc]

# Supplementary Material (ESI) for Chemical Communications

# This journal is © The Royal Society of Chemistry 2002

Formation of a tris-capsule and a tris-carceplex from a

cyclic six-bowl assembly

# Rajesh Mungaroo and John C. Sherman*

*Department of Chemistry, University of British Columbia*

*2036 Main Mall, Vancouver, BC V6T 1Z1, Canada.*

*E-mail: sherman@chem.ubc.ca*

**Assembly numbers (AN)**. Assembly numbers as described in detail by Gibb and Gibb13 are the observed yield divided by the theoretical yield, and reflect the efficiency of the assembly process. For the corresponding single carceplex, the AN was determined to be 2.64,13 based on a 33% statistical yield and an 87% observed yield. The simpler calculation, based on yield per bond formation, does not fully reflect how efficiently the assembly process avoids non-productive pathways. That is, whether there are many or few paths that may lead to undesired products, the simple yield per bond would be the same, whereas the ANs would be different because the theoretical yields would differ. The problem with ANs is that each bond formation must be considered possible or not, unless one adds in a (at this stage rather subjective) weighing factor. Whereas one can envision moderately, highly, or un-strained bonds that have different likelihoods of forming, the theoretical yield in an AN must (currently) decide yay or nay with no maybes. With complex systems like formation of tris-carceplex **7**(guests)3 or even bis-carceplex **4**(guests)2, there are a great multitude of potential bonds that could form and lead to undesired products. Thus, the theoretical yields for **7**(guests)3 range from 0.64% to 13%, depending on what bonds one considers make-able. These theoretical yields lead to an AN for **7**(guests)3 of 2.84-57.8. This factor of 20 range in ANs can be taken as the (current) error in AN estimation, at least for assembly of **7**(guests)3. Thus comparison of ANs in such cases as the mono-, bis-, and tris-carceplex is currently lacking in utility; a more refined method of calculating ANs would be very useful. Overall we can say that the assembly process to form the tris-carceplex is on par with or even better than that for formation of the mono-carceplex.

# Experimental

HPLC grade acetone (Fisher), benzene (Fisher) and methanol (Fisher), DMSO (Fisher), methyl acetate (Aldrich) were used without further purification. NMP (Advanced Chem Tech) was distilled over BaO and stored over 4 Å molecular sieves. 1H NMR spectra were recorded on an Avance-400 MHz instrument in either CDCl3, DMSO-d6 or nitrobenzene-d5 using the residual solvent signals as references. “Acetal” in the NMR assignments refers to the OCH2O linkages between the bowls; Hin and Hout refer to the diastereotopic OCH2O intra-bowl bridges; “para”-H refers to the protons on the bridged aromatic rings. Mass spectra were recorded on a Bruker Reflex MALDI-TOF instrument in the reflectron mode and are accurate to one part per thousand. The calculated molecular weights are based on the average mass of the various isotopes. Column chromatography was performed using silica gel (BDH, 230-400). Radial chromatography was performed on a chromatotron (Model 7924, Harrison Research) with plates prepared using silica gel (60 PF254, EM Reagents).

Hexamer **5**: Diol **1** (1.00 g, 0.835 mmol) and CH2BrCl (27l L, 4.18 mmol, 5 equiv.) were each dissolved in DMSO (50 mL), were placed in two separate syringes, and added over a period of 24 hours to a three-necked flask containing DMSO (500 mL) and K2CO3 (2.31g, 16.7 mmol, 20 equiv.) and kept at 60 oC. The mixture was stirred constantly under an N2 atmosphere for 48 hours. The solvent was removed *in vacuo*, and 1 M HCl (300 mL) was added to the residue. The aqueous layer was extracted with CHCl3 (3 x 100 mL), and the combined organic extracts were dried over MgSO4 and filtered. The solvent was removed *in vacuo* and the crude mixture was dissolved in a minimum amount of ethyl acetate and kept at 4 oC for 24 hours. The mixture was filtered and the filtrate was concentrated, redissolved in chloroform and loaded on a silica gel (50 g) column. The column was then eluted with CHCl3/hexanes (4:1) followed by neat chloroform. The relevant fractions were collected and the solvent was removed *in vacuo* to give a yellow residue. The residue was dissolved in CH2Cl2, loaded onto a chromatotron, and eluted with CH2Cl2. The second fraction was collected, dried, and the solid was recrystallized in CHCl3/hexanes to give hexamer **5** (10 mg, ~1% yield). 1H NMR (CDCl3) 7.057.29 (m, CH2CH2C6*H5* + CHCl3), 6.86 (s, 12 H, *para*-H), 6.80 (s, 12 H, *para*-H), 5.70 (d, 7.1 Hz, 24H, Hout), 5.36 (s, 12H, Hacetal), 4.89 (s, 24H, OC*H2*Ph), 4.79 (t, 7.7 Hz, 24H, Hmethine), 4.42 (d, 7.1 Hz, 24H, Hin), 2.61 (m, 48H, CH2C*H2*C6H5), 2.42 (m, 48H, *CH2*CH2C6H5); MS: *m/z* = 7281 (100%) [*M*Na+], calcd for C474H408O72Na+ = 7279.

Hexamer **6**:Hexamer **5** (15.0 mg, 2.07 mol) was dissolved in benzene (5 mL), methanol (250 L), and acetone (250 L). 10% Pd/C (15.0 mg) was added to the mixture. The flask was evacuated before applying a hydrogen pressure of four atmospheres. The flask was opened to the air after shaking for 48 hours. The mixture was poured onto a pad of celite, and eluted with chloroform/methanol (97/3). The solvent was removed *in vacuo* to give a white residue, which was recrystallized in chloroform to give hexamer **6** (11.5 mg, 1.86 mol, 90%). 1H NMR (DMSO-d6, 87 oC) 8.57 (s, 12H, OH, disappears upon addition of D2O), 7.49 (s, 12 H, *para*-H), 7.10-7.29 (m, 120H, CH2CH2C6*H5*), 7.01 (s, 12 H, *para*-H), 5.74 (d, 7.2 Hz, 24H, Hout), 5.42 (s, 12H, Hacetal), 4.64 (m, 24H, Hmethine), 4.32 (d, 7.2 Hz, 24H, Hin), 2.56 (m, 96H, C*H2*C*H2*C6H5); MS: *m/z* = 6200 (100%) [*M*Na+], 6197 calcd for C390H336O72Na+ = 6197.

Tris-carceplex **7**(methyl acetate)3**:** Hexamer **6** (10.2 mg, 1.65 mol), K2CO3 (9.1 mg, 65.6 mol, 40 equiv.), CH2BrCl (11.6 L of 1 mmol/mL CH2BrCl solution prepared in NMP, 7 equiv.) and 5 mol % methyl acetate (410 L, 3126 equiv.) were added to *N*-methylpyrrolidinone (10 mL). The mixture was stirred under an N2 atmosphere for 24 hours at ambient temperature. On the second day, an additional amount of CH2BrCl (7 equiv.) was added to the flask, the temperature was raised to 55 oC, and and the resulting mixture was stirred for 24 hours. The solvent was removed *in vacuo*, and 1 M HCl (10 mL) was added to the residue. The aqueous layer was extracted with chloroform (3 x 10 mL), dried over MgSO4, filtered, and concentrated *in vacuo*. The crude mixture was redissolved in a minimum amount of CHCl3, loaded on a silica gel (1 g) column, and eluted with CHCl3/hexanes (3:1). The least polar fraction was concentrated under vacuum, redissolved in CHCl3 (0.5 mL), and methanol (0.2 mL) was added. The resulting mixture was kept at 4 oC overnight, and the precipitate was filtered to give tris-carceplex **7**(methyl acetate)3(4.0 mg, 0.618 mol, 37 %). 1H NMR; 1H-1H COSY and NOE correlations are summarized in Table S1., see Fig. S1. for labels: (C6D6, 330 K) 7.34-6.80 (m, *para*H + CH2CH2C6H5 + C6D5H), 6.38 (m, 28H, Hc, e , g or h, l ), 6.29(s, 8H, Hj), 6.24(m, 4H, Hn), 6.01 (brs, 4H, Hi), 5.97 (m, 4H, Hg or h), 5.21(m, 8H, Hk), 5.05 (m, 16H, Ha, b), 4.61 (m, 8H, Hd or f), 4.59 (m, 8H, Hm), 4.53 (m, 8H, Hd or f), 2.65 (m, 48H, CH2C*H2*Ph), 2.41 (m, 48H, C*H2*CH2Ph), -0.09 (s, 3H, CH3COOC*H3* bound within the inner cavity), -0.33 (s, 6H, CH3COOC*H3* bound within the outer cavities), -1.70 (s, 3H, C*H3*COOCH3 bound within the inner cavity), -1.91 (s, 6H, C*H3*COOCH3 bound within the outer cavities); MS: *m/z* = 6494 (100 %) [*M*Na+], calcd for C390H336O72Na+ = 6492.

**Figure S1** Proton labeling for **7**(methyl acetate)3

**Table S1**. NOE and COSY correlations of selected protons in tris-carceplex **7**(methyl acetate)3

| Protons and their chemical shifts (ppm) | NOE correlations | COSY couplings |
| --- | --- | --- |
| Hc, e (6.38) | Ha, b, d, f, g, h | Hd, f |
| Hl (6.38) | Hk, m, n | Hm |
| Hg, h (6.38, 5.97) | Hc, d, e, f | Hg, h |
| Hj (6.29) | none | none |
| Hn (6.24) | Hl, m | none |
| Hi (6.01) | Hc, d | none |
| Hk (5.21) | Hl, m, *para*H, C*H2*CH2Ph | C*H2*CH2Ph |
| Ha, b (5.05) | Hc, d, e, f, *para*H, C*H2*C*H2*Ph | C*H2*CH2Ph |
| Hd, f (4.61, 4.53) | Ha, b, c, e, g, h, C*H3*COOC*H3* bound in the outer cavities | Hc, e |
| Hm (4.59) | Hk, l, n, C*H3*COOC*H3* bound in the inner cavity | Hl |
| C*H3*COOCH3 guest bound in the outer cavities (-1.91) | Hc, d, e, f,*para*H, | none |
| C*H3*COOCH3 guest bound in the inner cavity (-1.70) | Hm, l | none |
| C*H3*COOCH3 guest bound in the outer cavities (-0.33) | Hc, d, e, f,*para*H, | none |
| CH3COOC*H3* guest bound in the inner cavity(-0.09) | Hm, l | none |

Tris-capsule **8**(methyl acetate)3: Hexamer **6** (7.0 mg, 1.13 mol), DBU (1.2 L, 8.02 mol, 7 equiv.), methyl acetate (1 L, 12.6 mol, 11 equiv.) were placed in an NMR tube and nitrobenzene-d5 (450 L) was added. 1H NMR: 1H-1H COSY and NOE/EXSY correlations are summarized in Table S2; (nitrobenzene-d5, 127 oC)  7.05-7.50 (m, CH2CH2C6*H5* + *para*H + C6D4HNO2), 6.91 (m, 8H, Hout), 6.72 (m, 8H, Hout), 6.41 (m, 8H, Hout), 5.1-5.3 (m, 36H, Hmethine + Hacetal), 4.6-4.8 (m, 24H, Hin), 2.78 (m, C*H2*C*H2*Ph + DBU), 0.10 (s, 6H, CH3COOC*H3* bound within the outer cavities), 0.05 (s, 3H, CH3COOC*H3* bound within the inner cavity), -1.47 (s, 6H, C*H3*COOCH3 bound within the outer cavities), -1.51 (s, 3H, C*H3*COOCH3 bound within the inner cavity).

**Table S2**. NOE/EXSY and COSY correlations of selected protons in tris-carceplex **8**(methyl acetate)3

| Protons and their chemical shifts (ppm) | NOE/EXSY correlations | COSY couplings |
| --- | --- | --- |
| Hout (6.91, 6.72, 6.41) | Hin | Hin |
| Hmethine (5.1-5.3) | C*H2*CH2Ph, *para*H | C*H2*CH2Ph |
| Hin (4.6-4.8) | Hout, *para*H | Hout |
| Hacetal (5.1-5.3) | none | none |
| CH3COOC*H3* bound within the outer cavities (0.10) | unbound CH3COOC*H3* | none |
| CH3COOC*H3* bound within the inner cavity (0.05) | unbound CH3COOC*H3* | none |
| C*H3*COOCH3bound within the outer cavities (-1.47) | unbound C*H3*COOCH3 | none |
| C*H3*COOCH3bound within the inner cavity (-1.51) | unbound C*H3*COOCH3 | none |
